# Supplementary material for: Validation of miRNA signatures for ovarian cancer earlier detection in the pre-diagnosis setting using machine learning approaches
Source: PubMed Central journal article supplement (PMC11231195; doi:10.3389/fonc.2024.1389066), 2024-06-25
Supplement: Image_1.pdf [file Image_1.pdf]

## *Supplementary Material*

### **Validation of miRNA signatures for ovarian cancer earlier detection in the pre-diagnosis setting using machine learning approaches**

**Konrad Stawiski<sup>1\*</sup>, Renée T. Fortner<sup>2,3\*</sup>, Luca Pestarino<sup>2,4\*</sup>, Sinan U Umu<sup>2</sup>, Rudolf Kaaks<sup>3</sup>, Trine B. Rounge<sup>2,5</sup>, Kevin M. Elias<sup>6,7</sup>, Wojciech Fendler<sup>1,8\*\*</sup>, Hilde Langseth<sup>2,9\*\*</sup>**

\*contributed equally and should be considered co-first authors

\*\*contributed equally and should be considered co-last authors

<sup>1</sup>Department of Biostatistics and Translational Medicine, Medical University of Lodz, Lodz, Poland

<sup>2</sup>Department of Research, Cancer Registry of Norway, Norwegian Institute of Public Health, Oslo, Norway

<sup>3</sup>Division of Cancer Epidemiology, German Cancer Research Center, Heidelberg, Germany

<sup>4</sup>Department of Gynecological Oncology, Division of Cancer Medicine, Oslo University Hospital, Oslo, Norway

<sup>5</sup>Centre for Bioinformatics, Department of Pharmacy, University of Oslo, Oslo, Norway

<sup>6</sup>Division of Gynecologic Oncology, Department of Obstetrics, Gynecology and Reproductive Biology, Brigham and Women's Hospital, Boston, MA, United States

<sup>7</sup>Harvard Medical School, Boston, MA, United States.

<sup>8</sup>Department of Radiation Oncology, Dana-Farber Cancer Institute, Boston, MA, United States

<sup>9</sup>Department of Epidemiology and Biostatistics, School of Public Health, Imperial College London, London, UK

#### **\* Correspondence:**

Konrad Stawiski, M.D., Ph.D.

Department of Biostatistics and Translational Medicine  
Medical University of Lodz  
Mazowiecka 15, 92-215 Lodz, Poland  
+48 42 42 272 53 85  
konrad.stawiski@umed.lodz.pl

Renée Turzanski Fortner, Ph.D.  
Cancer Registry of Norway  
Norwegian Institute of Public Health  
Postbox 5313 Majorstuen  
0304 Oslo, Norway  
+47 22 92 88 02  
rtfo@kreftregisteret.no

## Supplementary Figures and Tables

## Supplementary Figures

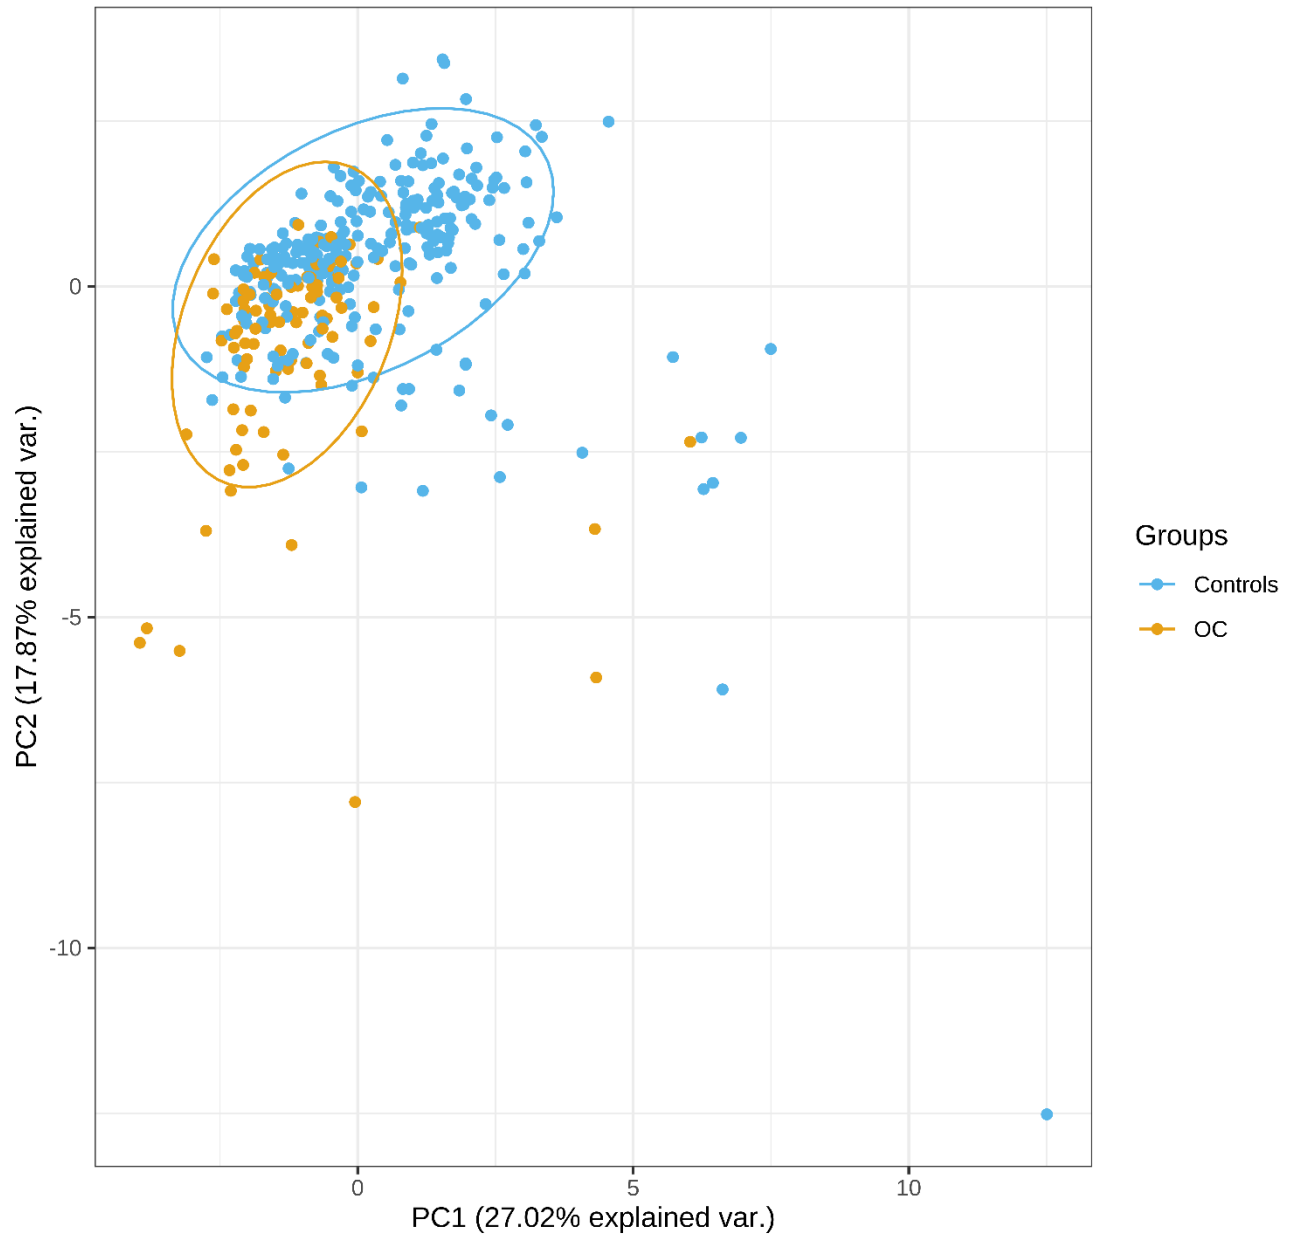

**Supplemental Figure 1.** The principal component analysis showed moderate differences due to batch effect in RNA profiles between ovarian cancer cases and controls in the JanusRNA study.

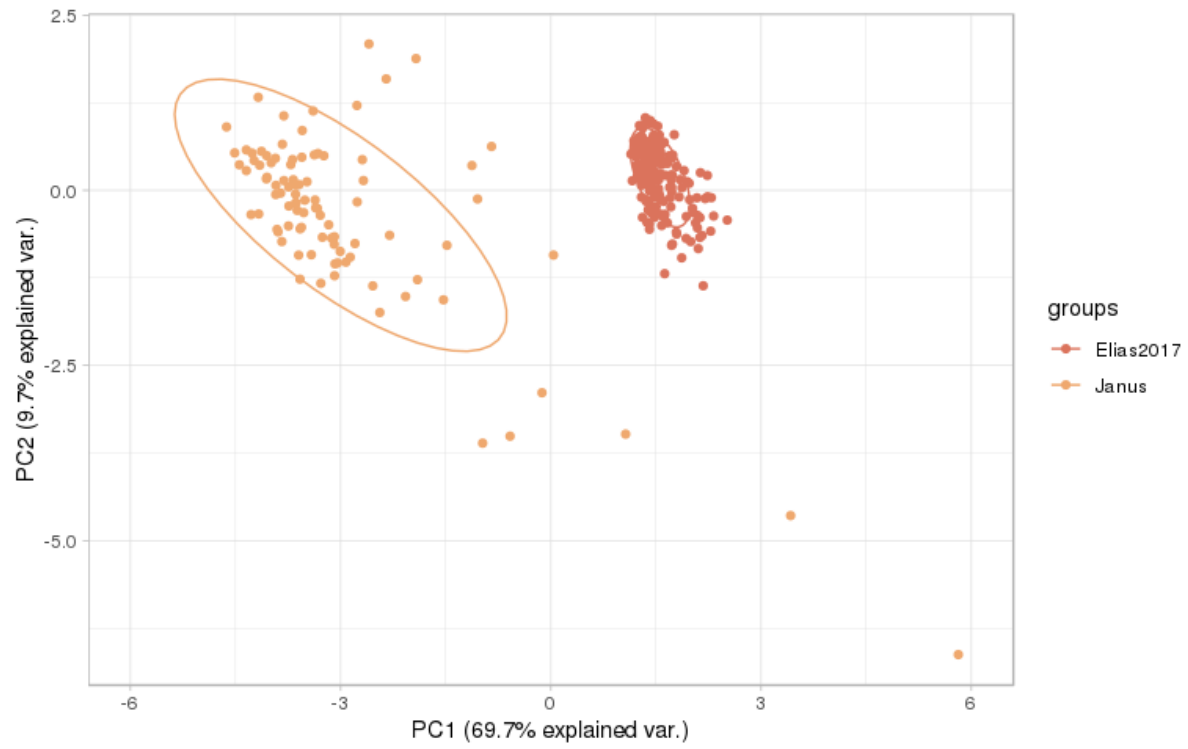

**Supplemental Figure 2.** The initial principal component analysis showed significant differences in RNA profiles by study when comparing the data from Elias 2017 and the JanusRNA study.

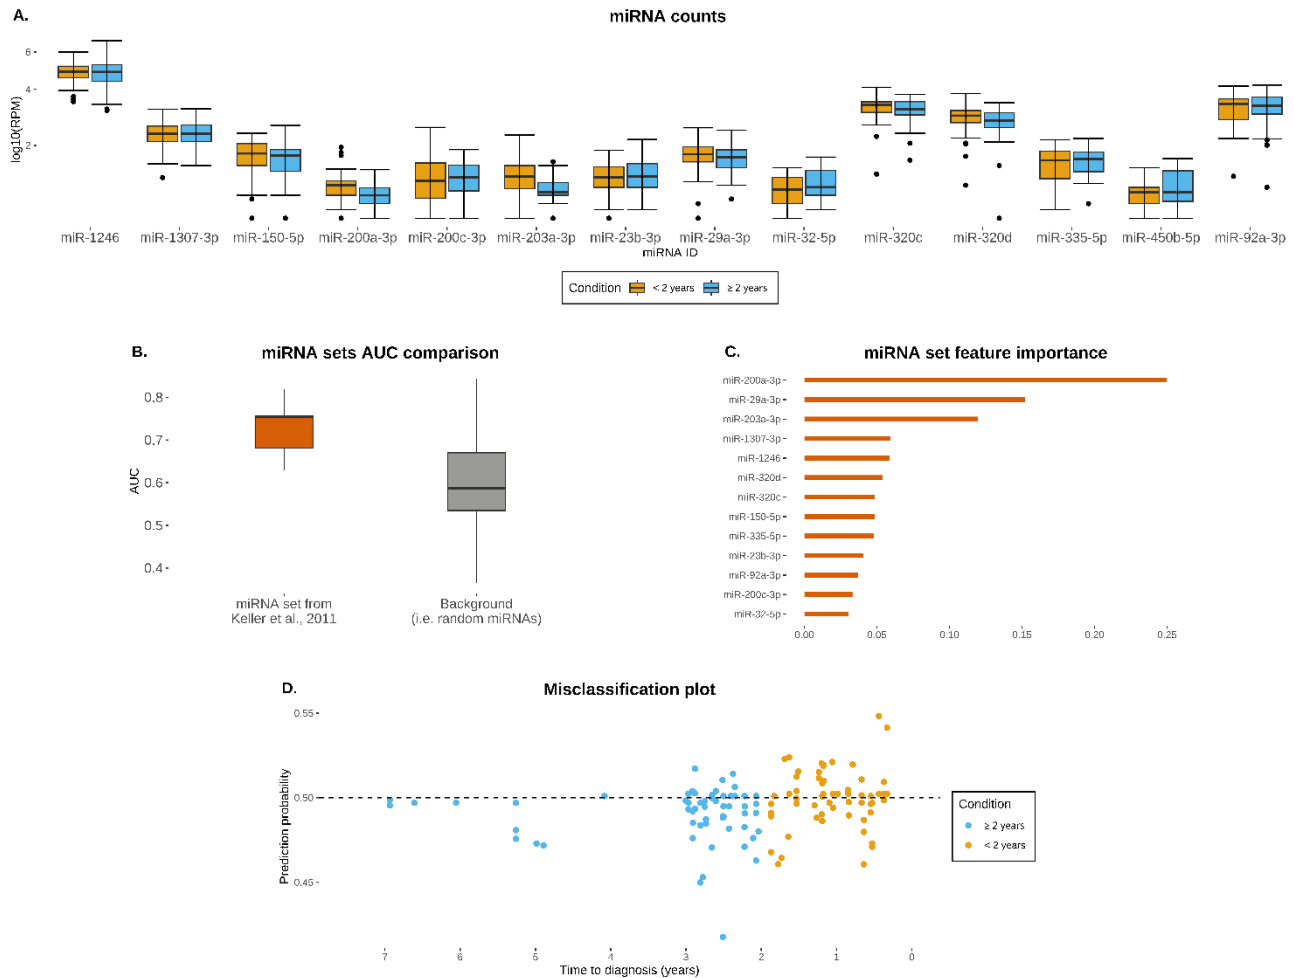

**Supplemental Figure 3.** Evaluation of miRNA set from dataset described in Keller et al. (2017) in JanusRNA ovarian cancer case set. **(a)** miRNA counts for the evaluated panel, by time between blood collection and diagnosis (<2 years,  $\geq 2$  to 7 years; microRNAs log<sub>10</sub> transformed for visualization and zero values omitted from the plot); **(b)** Boxplots of model performance for the primary evaluated miRNA signature and random miRNA set; **(c)** Feature importance for each of the included miRNAs **(d)** Misclassification plot of the test samples based on the miRNA signature, y axis represents prediction probability for a given observation to have been sampled within 2 years prior to diagnosis.

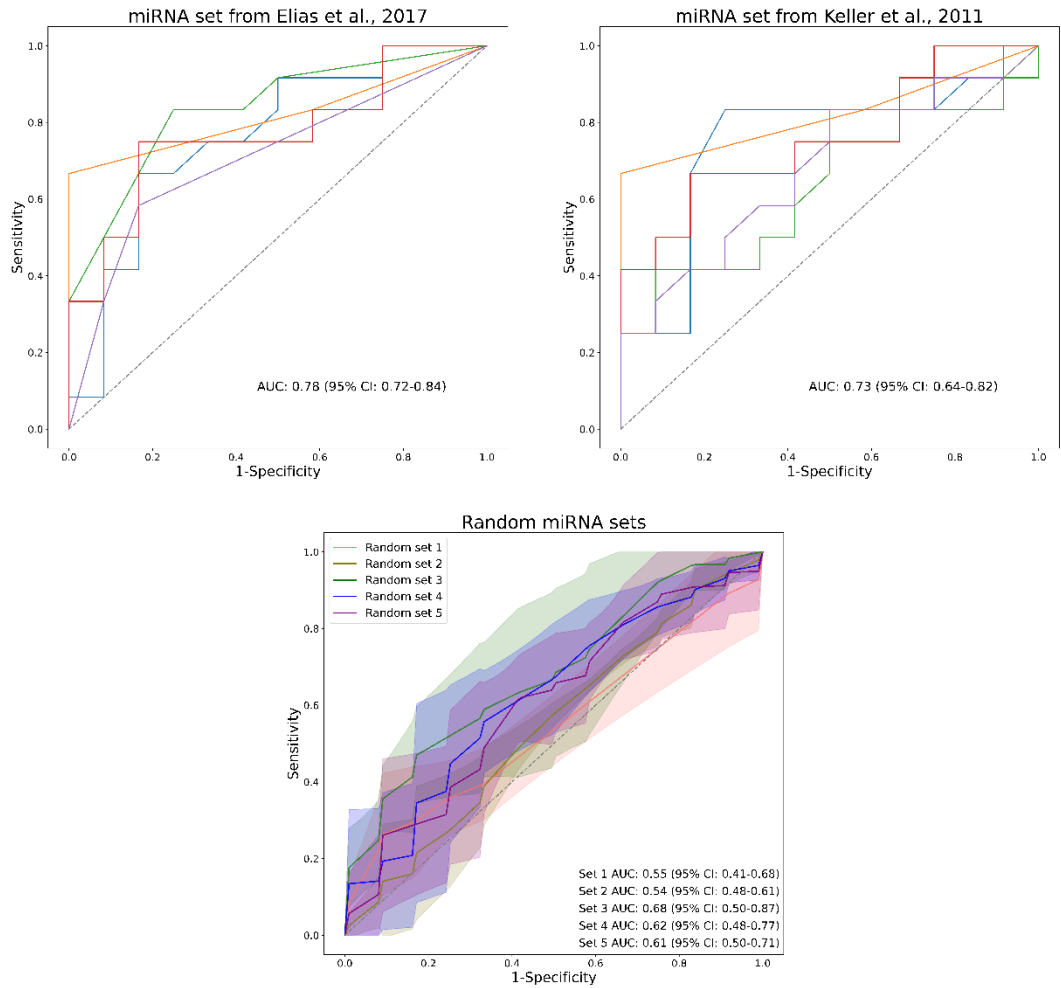

**Supplemental Figure 4.** ROC curves for the XGBoost model on the evaluated miRNA sets. Each curve represents one of the five training/test split performed. The average AUC and relative 95% confidence intervals are also shown for each of the miRNA sets. In the random miRNA sets figure, each curve represents the average of each of the five training/test split repetitions curve and its  $\pm$  one standard deviation from the mean.

**A. miRNA random sets AUC comparison**

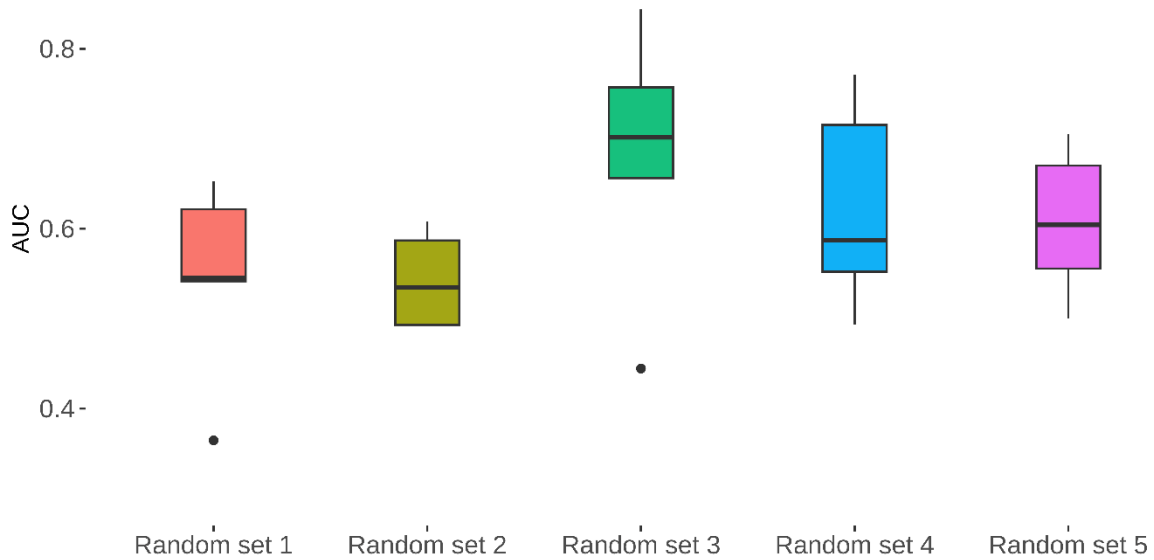

**B. miRNA random sets feature importance**

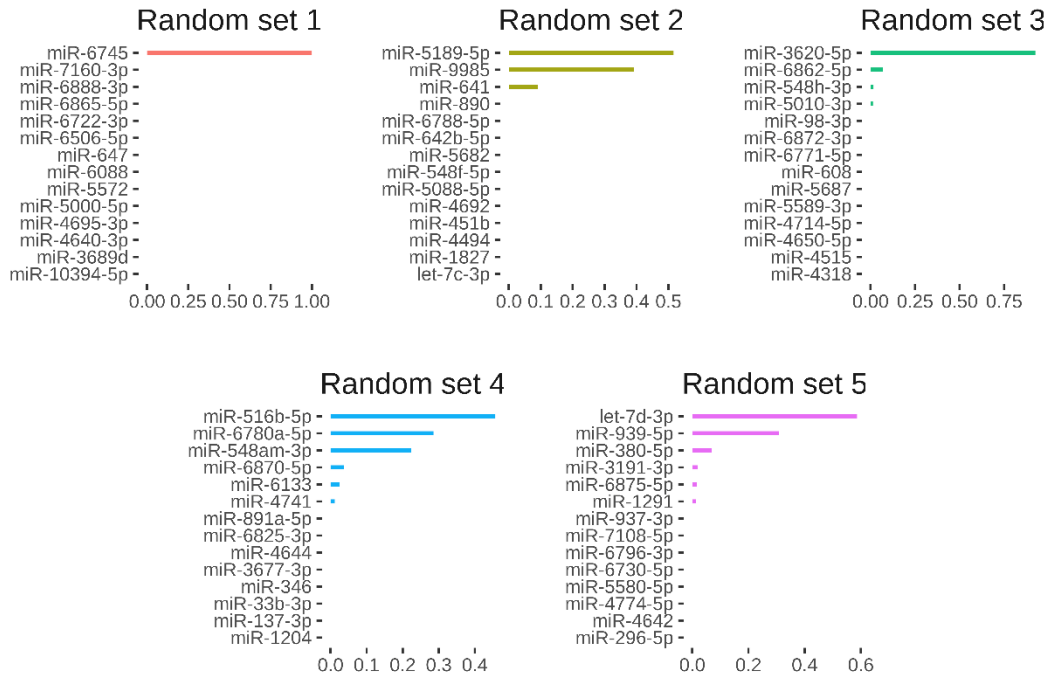

**Supplemental Figure 5.** Boxplots of model performance for the five sets randomly selected miRNAs (14 random miRNAs for each set).

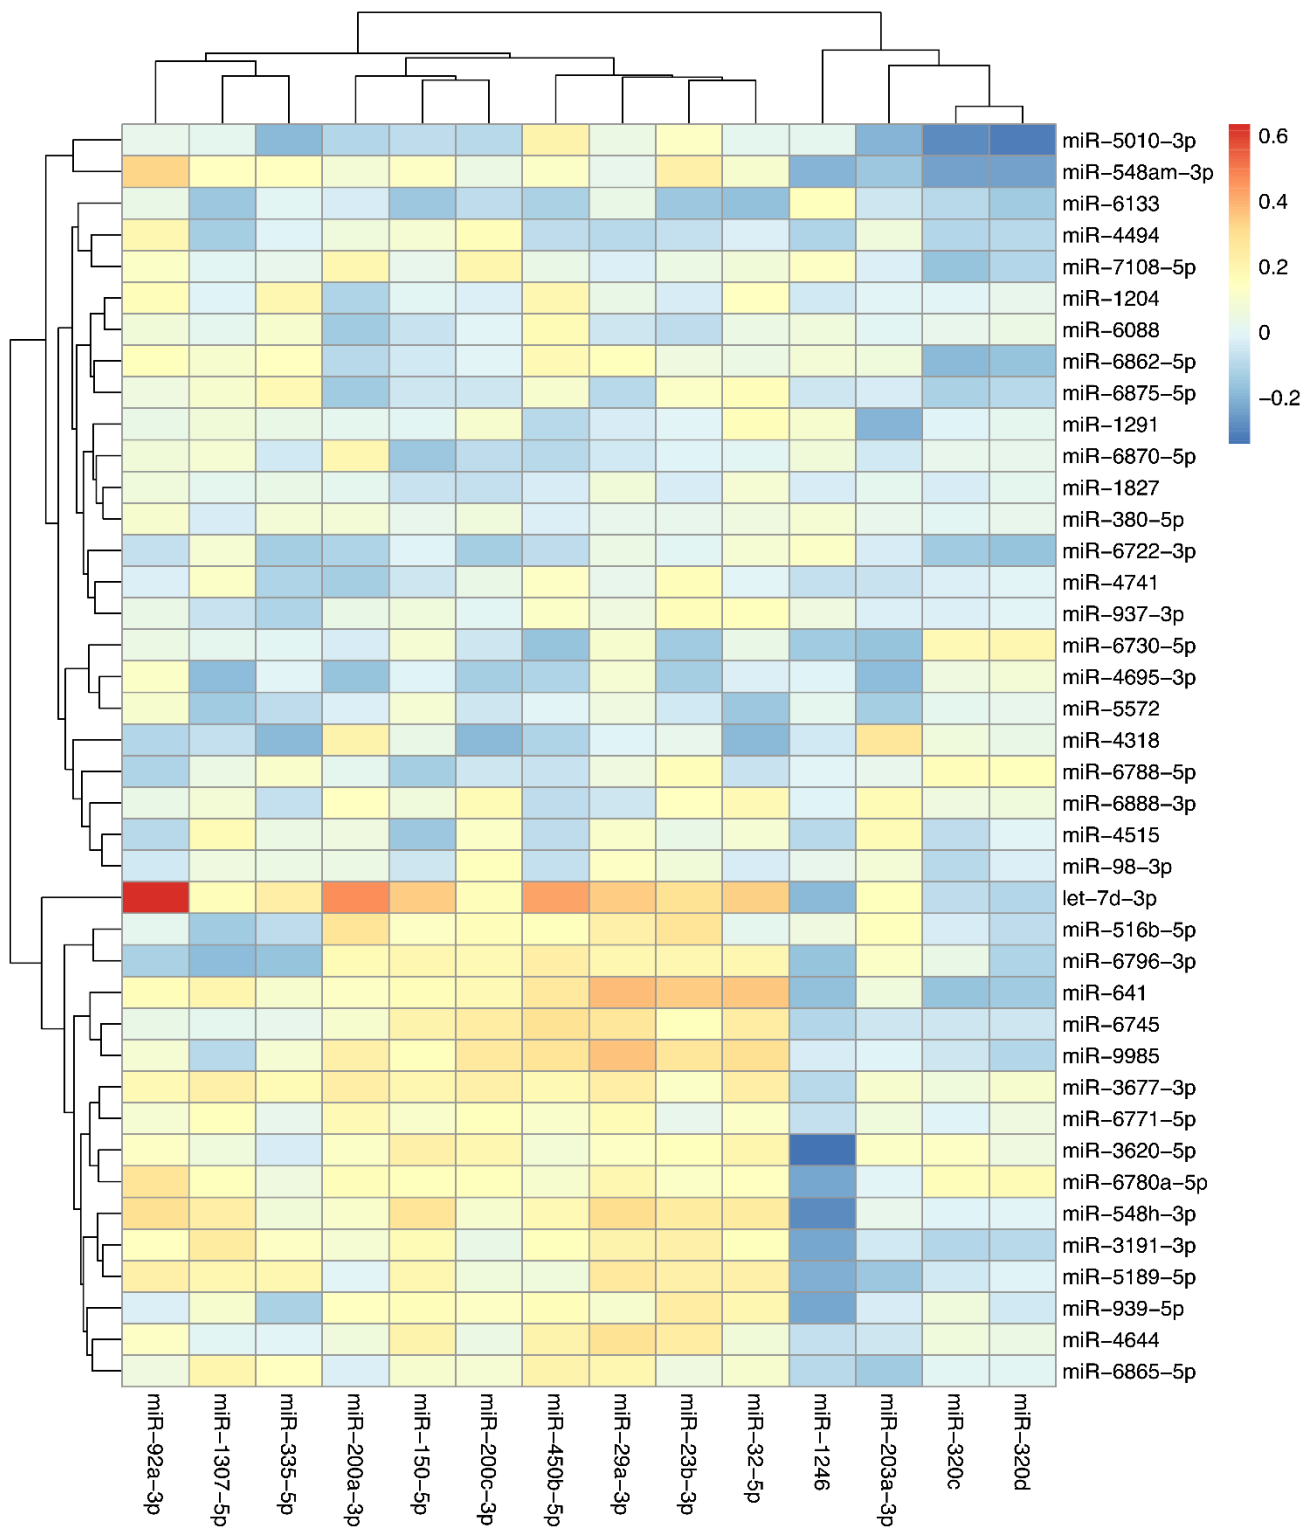

**Supplemental Figure 6.** Spearman correlation heatmap between the miRNA set from Elias et al. (2017) and the randomly selected miRNA with non-zero counts modelled in Supplemental Figure 4.

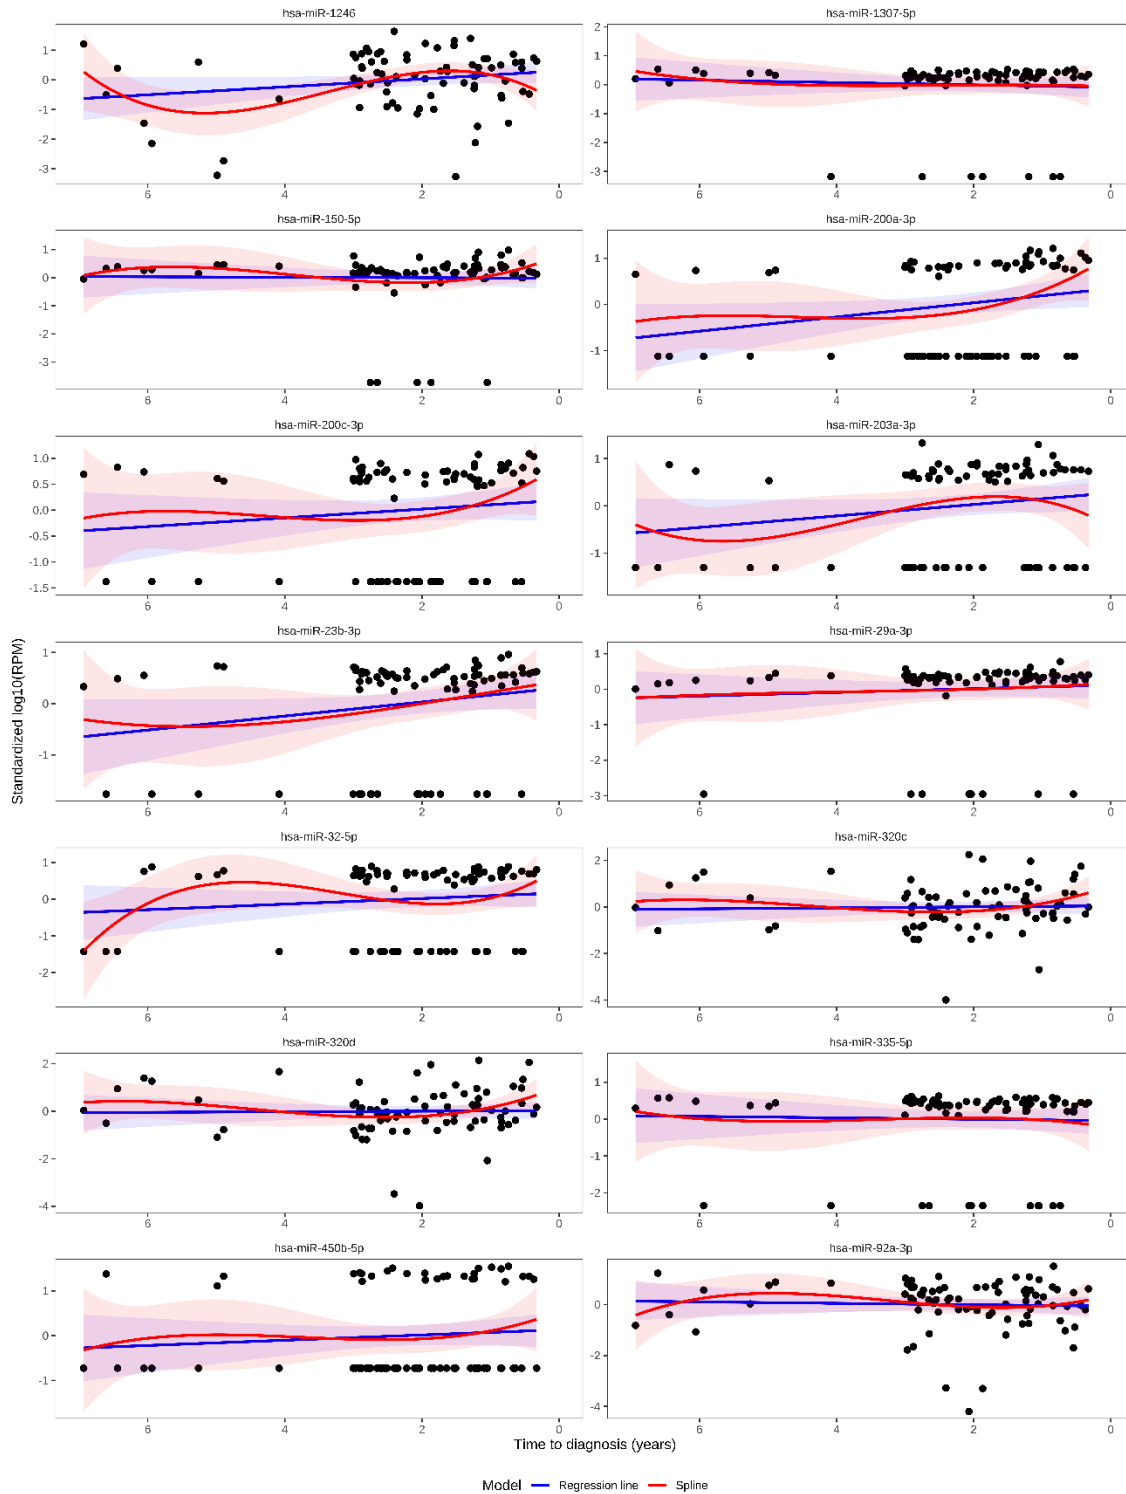

**Supplemental Figure 7.** Standardized  $\log_{10}$ -transformed RPM miRNA counts (z-score of  $\log_{10}$  transformed values) dynamics from dataset described in Elias et al. (2017) in JanusRNA ovarian cancer case set.
